# Supplementary material for: Simultaneous determination of aconitine, mesaconitine, hypaconitine, bulleyaconitine and lappaconitine in human urine by liquid chromatography-electrospray ionization-tandem mass spectrometry
Source: Royal Society of Chemistry journal article supplement (doi:10.1039/c3ay40328a), 2013-01-01
Supplement: c3ay40328a.pdf [file c3ay40328a.pdf]

## Electronic Supplementary

### **Simultaneous determination of aconitine, mesaconitine, hypaconitine, bulleyaconitine and lappaconitine in human urine by liquid chromatography-electrospray ionization-tandem mass spectrometry**

Mei Li<sup>a,b</sup>, Zongwei Cai<sup>b,\*</sup>

<sup>a</sup> *Dalian Medical University Institute of Cancer Stem Cell, 9 West section, Lvshun south road, Dalian, P.R. China 116044*

<sup>b</sup> *Department of Chemistry, Hong Kong Baptist University, Kowloon, Hong Kong SAR, China*

\* Corresponding author

*Tel.: +852 34117070; fax: +852 34117348.*

*E-mail address: zwcai@hkbu.edu.hk (Z. Cai).*

Table S1. Data of calibration curves and LODs for the alkaloids in human urine.

| Analyte         | Correlation equation           | Correlation coefficient ( $r^2$ ) | Linear range ( $\mu\text{g/ml}$ ) | LOD ( $\mu\text{g/ml}$ ) |
|-----------------|--------------------------------|-----------------------------------|-----------------------------------|--------------------------|
| Lappaconitine   | $Y=1\text{E}+07X+178918$       | 0.990                             | 0.02-5.0                          | 0.005                    |
| Mesaconitine    | $Y=5\text{E}+06X-618175$       | 0.992                             | 0.02-5.0                          | 0.010                    |
| Hypaconitine    | $Y=8\text{E}+07X-8\text{E}+06$ | 0.995                             | 0.02-5.0                          | 0.005                    |
| Aconitine       | $Y=1\text{E}+08X-9\text{E}+06$ | 0.992                             | 0.02-5.0                          | 0.005                    |
| Bulleyaconitine | $Y=9\text{E}+07X-1\text{E}+07$ | 0.992                             | 0.02-5.0                          | 0.0025                   |

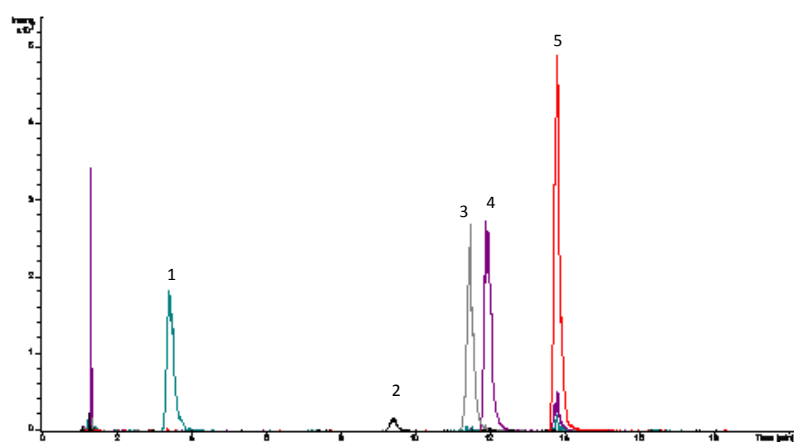

Figure S1. Chromatographic separation of the 5 alkaloids. 1. Lappaconitine; 2. Mesaconitine; 3. Hypaconitine; 4. Aconitine; 5. Bulleyaconitine.
